# Supplementary material for: Oxidation reactions catalyzed by osmium compounds. Part 4. Highly efficient oxidation of hydrocarbons and alcohols including glycerol by the H2O2/Os3(CO)12/pyridine reagent
Source: Royal Society of Chemistry journal article supplement (doi:10.1039/c3ra41997e), 2013-01-01
Supplement: c3ra41997e.pdf [file c3ra41997e.pdf]

Oxidation reactions catalyzed by osmium compounds.  
Part 4.<sup>☆</sup> Highly efficient oxidation of hydrocarbons and  
alcohols including glycerol by the  
 $\text{H}_2\text{O}_2/\text{Os}_3(\text{CO})_{12}$ /pyridine reagent

Georgiy B. Shul'pin,<sup>a,\*</sup> Yuriy N. Kozlov,<sup>a</sup> Lidia S. Shul'pina,<sup>b</sup>  
Wagner A. Carvalho<sup>c</sup> and Dalmo Mandelli<sup>c</sup>

<sup>a</sup> *Semenov Institute of Chemical Physics, Russian Academy of Sciences, ulitsa Kosygina, dom 4, Moscow 119991, Russia*

<sup>b</sup> *Nesmeyanov Institute of Organoelement Compounds, Russian Academy of Sciences, ulitsa Vavilova, dom 28, Moscow 119991, Russia*

<sup>c</sup> *Center of Natural and Human Sciences, Federal University of ABC (UFABC), Santa Adélia Street, 166, Bangu, Santo André, SP, 09210-170, Brazil*

\* Corresponding author. Tel.: +7 495 9397317; fax: +7499 1376130; +7495 6512191; *e-mail* addresses: Shulpin@chph.ras.ru and gbsh@mail.ru (G.B. Shul'pin)

## Supplementary information



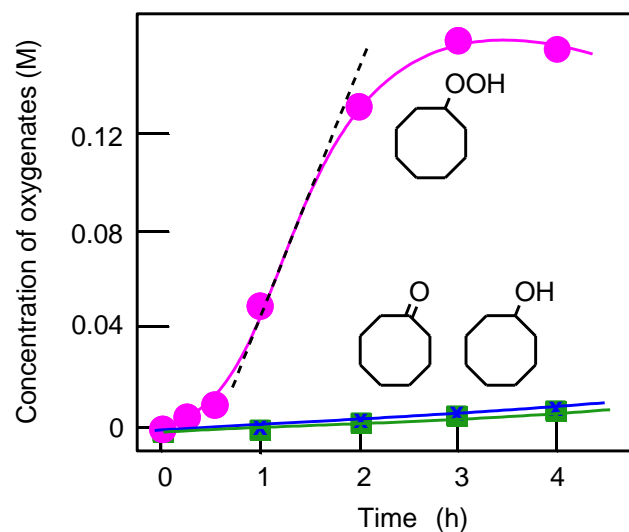

**Fig. S1.** Oxidation of cyclooctane with  $\text{H}_2\text{O}_2$  catalyzed by **1** in the absence of pyridine. Accumulation of cyclooctyl hydroperoxide, cyclooctanone, and cyclooctanol with time is shown. Conditions:  $[\text{cyclooctane}]_0 = 0.5 \text{ M}$ ,  $[\mathbf{1}]_0 = 1 \times 10^{-4} \text{ M}$ ,  $[\text{H}_2\text{O}_2]_0 = 1.5 \text{ M}$  (70% aqueous). Solvent MeCN,  $60^\circ\text{C}$ . Concentrations of the three products (cyclooctyl hydroperoxide, cyclooctanol and cyclooctanone) were calculated by the comparison of the concentrations of cyclooctanol and cyclooctanone measured before and after reduction with  $\text{PPh}_3$  (for this method, see Refs. 7b,8f,9). A dotted line corresponds to the maximum initial rate.

**Table S1.** Oxidation of cyclooctane with  $\text{H}_2\text{O}_2$  catalyzed by **1** in the presence of different amines <sup>a</sup>

| Entry | Amine           | Yield (% based on cyclooctane) after |     |      |
|-------|-----------------|--------------------------------------|-----|------|
|       |                 | 2 h                                  | 8 h | 24 h |
| 1     | Pyridine        | 2                                    | 5   | 11   |
| 2     | 4-Picoline      | 2                                    | 3   | 8    |
| 3     | Pyrazine        | 0                                    | 0   | 0.2  |
| 4     | 2,2'-Bipyridine | 0                                    | 0.4 | 2    |
| 5     | Imidazole       | 1                                    | 1.1 | 1.3  |

<sup>a</sup> Conditions:  $[\text{cyclooctane}]_0 = 0.5 \text{ M}$ ,  $[\mathbf{1}]_0 = 1 \times 10^{-5} \text{ M}$ ,  $[\text{H}_2\text{O}_2]_0 = 0.25 \text{ M}$  (70% aqueous),  $[\text{amine}] = 0.02 \text{ M}$ . Solvent MeCN,  $60^\circ\text{C}$ .



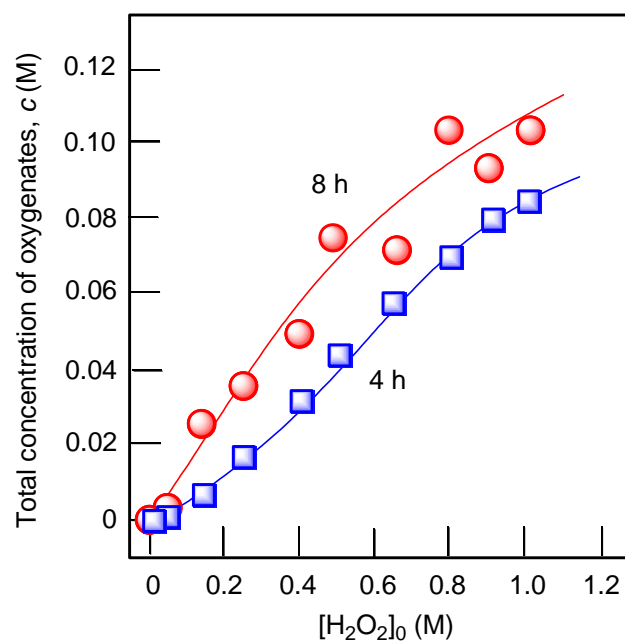

**Fig. S2.** Dependence of yield of oxygenates after 4 and 8 h on initial concentration of hydrogen peroxide in the cyclooctane oxidation. Conditions: [cyclooctane]<sub>0</sub> = 0.5 M, [py] = 0.1 M, [1]<sub>0</sub> =  $1 \times 10^{-5}$  M, H<sub>2</sub>O<sub>2</sub>, 70% aqueous, solvent MeCN, 60 °C. Concentration of water in the reaction was maintained constant [H<sub>2</sub>O] = *const* by adding necessary amounts of H<sub>2</sub>O.

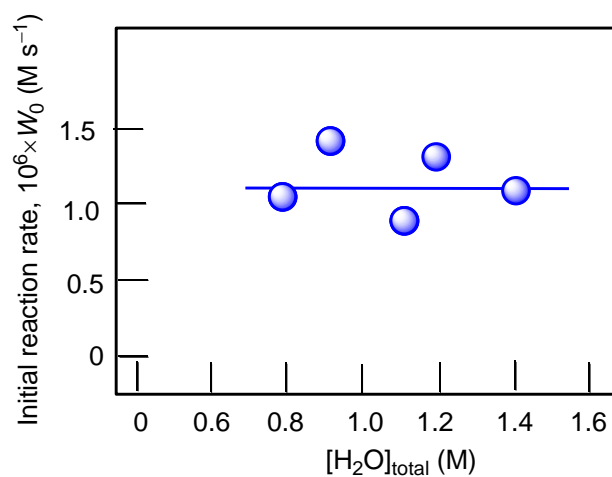

**Fig. S3.** Dependence of initial reaction rate  $W_0$  on total concentration of water in the cyclooctane oxidation. Conditions were the same as in the experiment shown in Fig. S2.



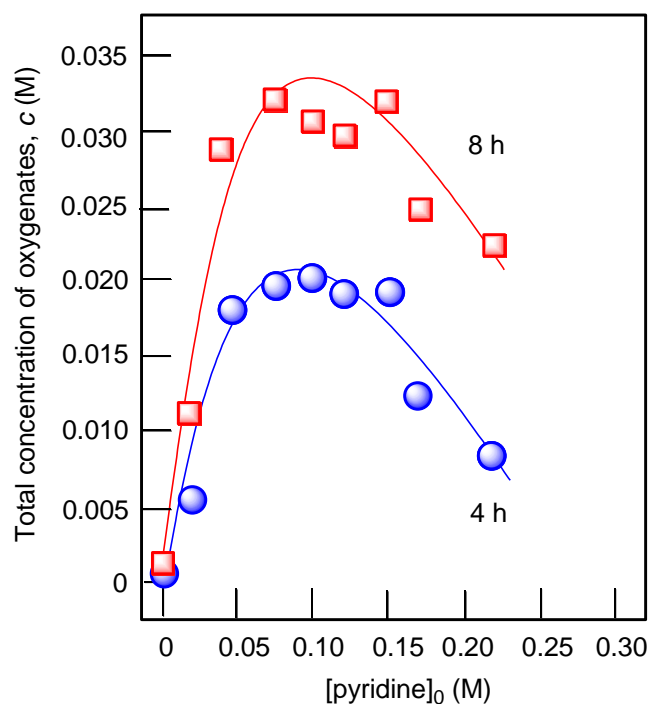

**Fig. S4.** Dependence of yield of oxygenates after 4 and 8 h on initial concentration of pyridine in the cyclooctane oxidation. Conditions were the same as in the experiment shown in Fig. 3.

**Table S2** Cyclohexane oxidation with H<sub>2</sub>O<sub>2</sub> in acetonitrile catalyzed by various metal complexes <sup>a</sup>

| Entry | Catalyst                                                                        | Concentration (M)      | Cocatalyst       | Time (h) | TON    | TON (per one ion) | Initial TOF (h <sup>-1</sup> ) | Initial TOF (per one ion)(h <sup>-1</sup> ) | Yield (%) <sup>b</sup> | Ref.      |
|-------|---------------------------------------------------------------------------------|------------------------|------------------|----------|--------|-------------------|--------------------------------|---------------------------------------------|------------------------|-----------|
| 1     | <b>1</b> <sup>b</sup>                                                           | 5 × 10 <sup>-6</sup>   | pyridine         | 13       | 60 000 | 20 000            | 24 000                         | 8000                                        | 56                     | This work |
| 2     | Cp* <sub>2</sub> Os <sup>c</sup>                                                | 1 × 10 <sup>-6</sup>   | pyridine         | 24       | 51 000 | 51 000            | 6000                           | 6000                                        | 6                      | 7c        |
| 3     | ( <i>n</i> -Bu <sub>4</sub> N)[VO <sub>3</sub> ] <sup>d</sup>                   | 1 × 10 <sup>-5</sup>   | PCA              | 6        | 5000   | 5000              | 700                            | 700                                         | 12                     | 9a,13–15  |
| 4     | ( <i>n</i> -Bu <sub>4</sub> N)[VO <sub>3</sub> ] <sup>d</sup>                   | 1 × 10 <sup>-6</sup>   | PCA              | 17       | 20 000 | 20 000            | 2100                           | 2100                                        | 5                      | 9a,13–15  |
| 5     | “Cu <sub>4</sub> ” <sup>e</sup>                                                 | 5 × 10 <sup>-5</sup>   | HCl              | 2        | 200    | 50                | 600                            | 150                                         |                        | 16a       |
| 6     | “Cu-1” <sup>f</sup>                                                             | 5 × 10 <sup>-5</sup>   | None             | 5        | 2200   | 2200              |                                |                                             | 14                     | 16b       |
| 7     | [Mn <sub>2</sub> L <sub>2</sub> O <sub>3</sub> ][PF <sub>6</sub> ] <sup>g</sup> | 3 × 10 <sup>-5</sup>   | MeCOOH           | 2        | 3300   | 1650              | 2700                           | 1350                                        | 46                     | 16c       |
| 8     | [Co <sub>4</sub> Fe <sub>2</sub> OSae <sub>8</sub> ] <sup>h,h</sup>             | 5 × 10 <sup>-5</sup>   | HNO <sub>3</sub> | 6        | 2280   | 380               |                                |                                             | 46                     | 16d       |
| 9     | [Co <sub>4</sub> Fe <sub>2</sub> OSae <sub>8</sub> ] <sup>h</sup>               | 11 × 10 <sup>-5</sup>  | HNO <sub>3</sub> | 5        | 720    | 120               | 11 200                         | 1870                                        | 21                     | 16d       |
| 10    | [Co <sub>4</sub> Fe <sub>2</sub> OSae <sub>8</sub> ] <sup>h</sup>               | 4.4 × 10 <sup>-5</sup> | HNO <sub>3</sub> | 5        | 3570   | 600               |                                |                                             | 26                     | 16d       |
| 11    | Cp <sub>2</sub> Fe <sup>i</sup>                                                 | 1 × 10 <sup>-4</sup>   | PCA              | 1.5      | 1200   | 1200              | 75                             | 75                                          | 32                     | 16e       |

<sup>a</sup> Yield was based on cyclohexane in cases when its amount was lower than the oxidant amount.

<sup>b</sup> Cyclooctane was used instead of cyclohexane.

<sup>c</sup> Decamethylisocyclopentadiene, Cp\* is pentamethylcyclopentadienyl.

<sup>d</sup> The efficient oxidizing reagent (*n*-Bu<sub>4</sub>N)[VO<sub>3</sub>]/PCA/H<sub>2</sub>O<sub>2</sub> (PCA is pyrazine-2-carboxylic acid) was initially described by one of us in Refs. 9a,13b–d. Mechanistic studies demonstrated <sup>14,15</sup> that this system operates with the participation of hydroxyl radicals.

<sup>e</sup> “Cu<sub>4</sub>” is tetracopper(II) triethanolamine complex [O<Cu<sub>4</sub>{N(CH<sub>2</sub>CH<sub>2</sub>O)<sub>3</sub>}<sub>4</sub>(BOH)<sub>4</sub>][BF<sub>4</sub>]<sub>2</sub>.

<sup>f</sup> “Cu-1” is complex Cu(MeCN)<sub>4</sub>BF<sub>4</sub>; *t*-BuOOH was used instead of H<sub>2</sub>O<sub>2</sub>.

<sup>g</sup> L = 1,4,7-trimethyl-1,4,7-triazacyclononane.

<sup>h</sup> [Co<sub>4</sub>Fe<sub>2</sub>OSae<sub>8</sub>] is complex [Co<sub>4</sub>Fe<sub>2</sub>OSae<sub>8</sub>]·4DMF·H<sub>2</sub>O, where H<sub>2</sub>Sae = salicylidene-2-ethanolamine.

<sup>i</sup> Ferrocene, Cp is cyclopentadienyl ligand.



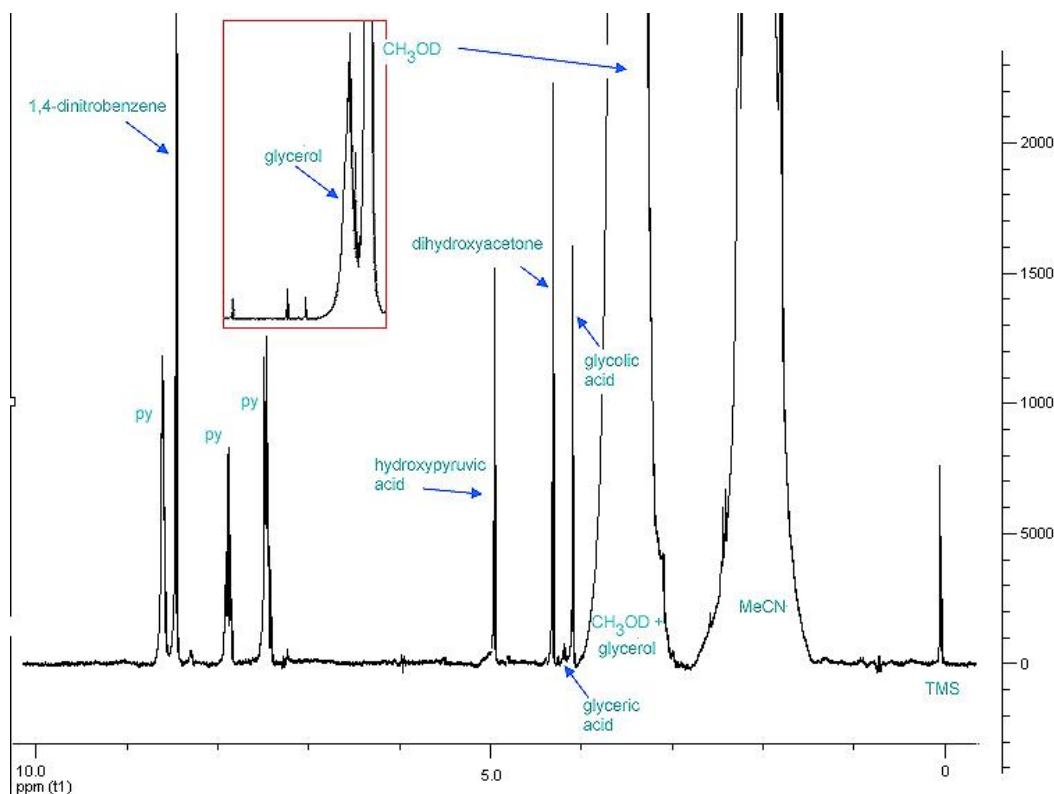

**Fig. S5.** An example of the  $^1\text{H}$  NMR spectrum of the reaction mixture obtained in the glycerol oxidation with  $\text{H}_2\text{O}_2$  catalyzed by  $\text{Os}_3(\text{CO})_{12}$  and pyridine.



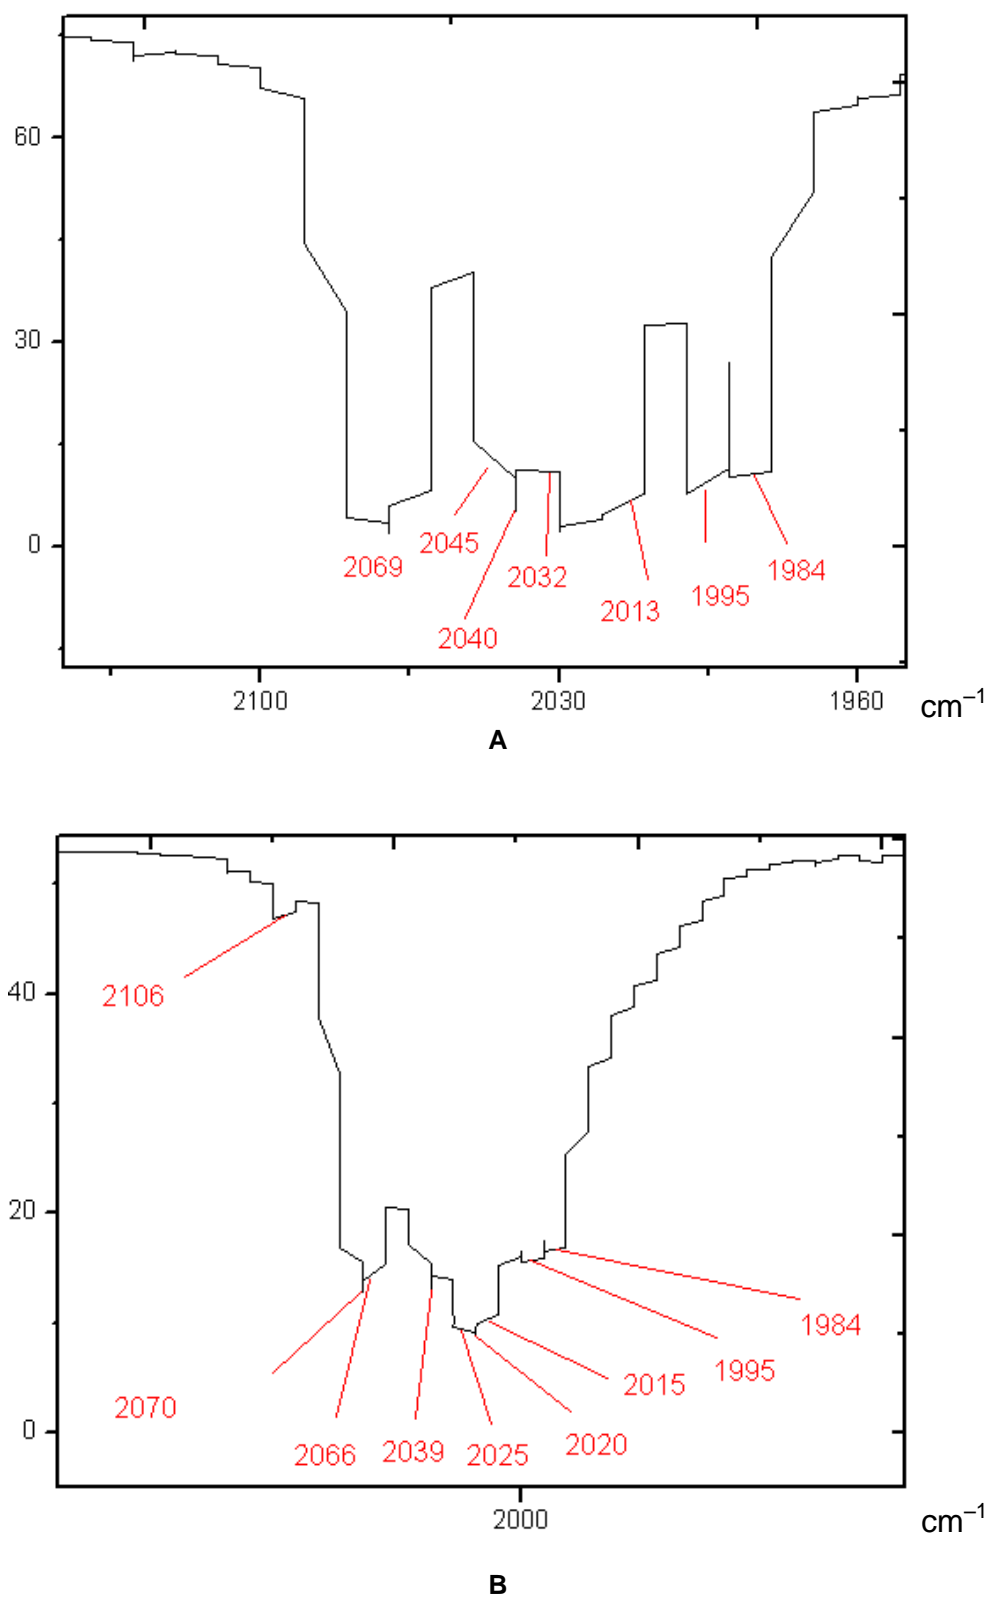

**Fig. S6.** The IR spectra of  $\text{Os}_3(\text{CO})_{12}$  (precatalyst **1**) (graph A) and evaporated stock solution of **1** in MeCN. Both spectra were recorded for the KBr tablet.



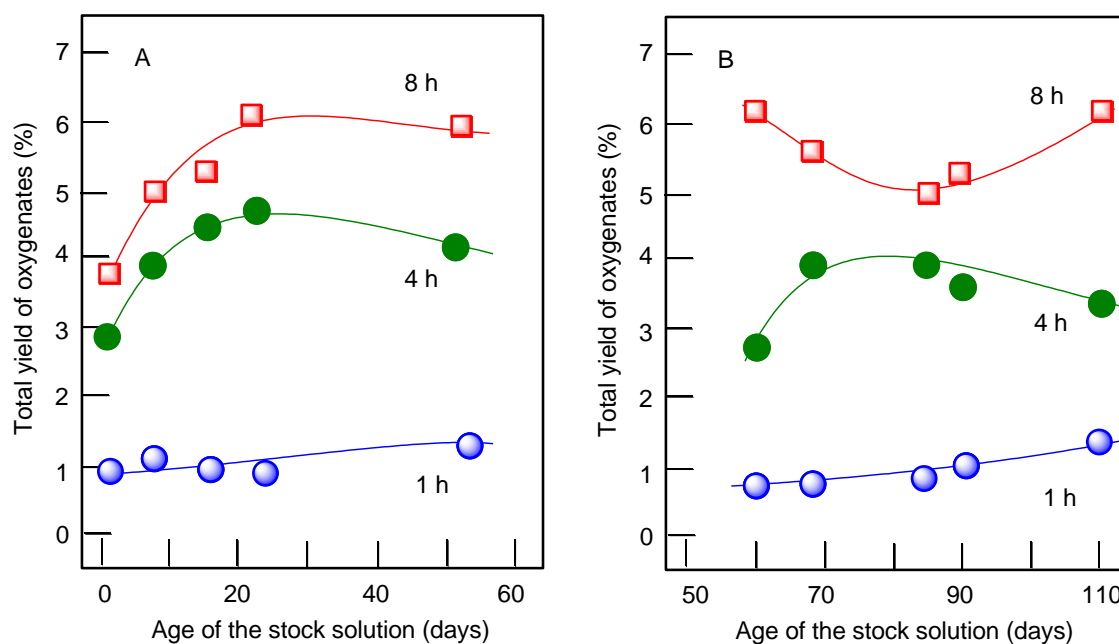

**Fig. S7.** Oxidation of cyclooctane with the  $\text{H}_2\text{O}_2/\text{Os}_3(\text{CO})_{12}$  (compound **1**)/pyridine system using the stock solutions stored previously at room temperature (Graph A) and in the refrigerator (Graph B). Yields of sum of products after 1, 4, and 8 h are shown. Other conditions:  $[\text{Os}_3(\text{CO})_{12}]_0 = 1 \times 10^{-5}$  M;  $[\text{H}_2\text{O}_2]_0 = 0.25$  M;  $[\text{pyridine}]_0 = 0.1$  M;  $[\text{cyclooctane}]_0 = 0.5$  M;  $60^\circ\text{C}$ .

### Estimation of alkyl hydroperoxide concentration by comparison of chromatograms obtained *before* and *after* reduction of the reaction solution with $\text{PPh}_3$

The quantification of alkyl hydroperoxides and ketones (aldehydes) and alcohols present in the reaction solution was performed using developed previously by Shul'pin<sup>7b,8f,9</sup> simple GC method with reduction of the reaction samples with triphenylphosphine. Alkyl hydroperoxides formed in the oxidation of alkanes decompose in the chromatograph to afford corresponding alcohols and ketones (aldehydes) as main products:

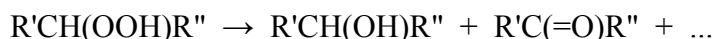

The alcohol/ketone (aldehyde) ratio is usually around 1:1. It should be noted that under mild conditions the alkyl hydroperoxide,  $\text{ROOH}$ , can be easily transformed into the corresponding ketone (or aldehyde),  $\text{R}'\text{COR}''$ , *via* dehydration without formation of the alcohol,  $\text{ROH}$ . However, at elevated temperature  $\text{ROOH}$  decomposes *via* a multistep radical-chain mechanism. Some stages of this process



afford both products, the ketone and alcohol in the 1:1 ratio ( $\text{ROOH} = \text{RO}\cdot + \text{HO}\cdot$ ;  $2\text{ROOH} = \text{RO}\cdot + \text{ROO}\cdot + \text{H}_2\text{O}$ ;  $\text{ROO}\cdot + \text{ROO}\cdot = \text{ROH} + \text{R}'\text{COR}'' + \text{O}_2$ ; see Ref. 1e, pp. 41, 47). If an excess of solid  $\text{PPh}_3$  is added to a sample of the reaction solution *ca.* 10 min before GC analysis the alkyl hydroperoxide,  $\text{ROOH}$ , present in the reaction mixture is completely reduced to the corresponding alcohol:

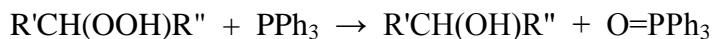

In this case, the chromatogram differs from that of a sample not subjected to the reduction (the alcohol peak rises, while the intensity of the ketone peak decreases). Measuring a sum of concentrations alcohols+ketone (aldehyde) *after* reduction with  $\text{PPh}_3$  gives us precise value of *total* concentration of all primary products (that is of alkyl hydroperoxide, alcohol and ketone). The comparison of this value with concentrations of the alcohol and ketone (aldehyde) *before* reduction with  $\text{PPh}_3$  allows us to estimate the *real* concentrations of the alkyl hydroperoxide, alcohol, and ketone (aldehyde) in the reaction solution.

The oxidation of alkane occurs in accord with the following equation

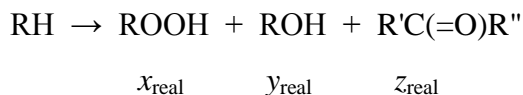

where  $[\text{ROOH}] = x_{\text{real}}$ ,  $[\text{ROH}] = y_{\text{real}}$ , and  $[\text{R}'\text{C}(=\text{O})\text{R}'] = z_{\text{real}}$  are real concentrations of the three products in the reaction sample. Injecting the sample directly into chromatograph leads to decomposition of really present in the solution alkyl hydroperoxide to give detectable by GC additional concentrations  $y_{\text{add}}$  and  $z_{\text{add}}$  of  $\text{ROH}$  and  $\text{R}'\text{C}(=\text{O})\text{R}''$ :

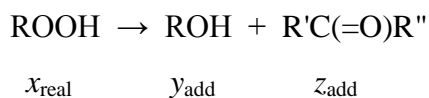

Assuming that alkyl hydroperoxide decomposes in the GC to produce the corresponding alcohol and ketone in the  $\approx 1:1$  ratio we can calculate the real concentrations of the three products of alkane oxidation using the following equations:

$$[\text{ROOH}] = x_{\text{real}} \approx (z_{\text{before}} - z_{\text{after}}) + (y_{\text{after}} - y_{\text{before}})$$

$$[\text{ROH}] = y_{\text{real}} \approx y_{\text{before}} - (z_{\text{before}} - z_{\text{after}})$$

$$[\text{R}'\text{C}(=\text{O})\text{R}'] = z_{\text{real}} = z_{\text{after}}$$



G. B. Shul'pin *et al.* / *RSC Adv.*, Supplementary information

where  $y_{\text{before}}$  and  $z_{\text{before}}$  are the amounts of alcohol and ketone (aldehyde) measured by GC before reduction with  $\text{PPh}_3$ ;  $y_{\text{after}}$  and  $z_{\text{after}}$  the amounts of alcohol and ketone (aldehyde) measured by GC after reduction with  $\text{PPh}_3$ , respectively. A more detailed description has been published.<sup>7b</sup>
